# Supplementary material
Source: PubMed Central journal article supplement (PMC4670787)
Supplement: NIHMS731595-supplement-1.pdf [file NIHMS731595-supplement-1.pdf]

### Supplemental Table I

Anti-mouse antibodies and secondary reagents used for flow cytometry and MACS purification

| Antibody              | Clone      | Dyes/Conjugates                | Source        |
|-----------------------|------------|--------------------------------|---------------|
| Anti-CD3              | 145-2C11   | PE-Cy7                         | Biolegend     |
| Anti-CD4              | GK1.5      | FITC/PE/eFluor450              | BD Bioscience |
| Anti-CD8 $\alpha$     | 53-6.7     | PE/Biotin/APC-eFluor780        | eBioscience   |
| Anti-CD8 $\beta$      | 53-5.8     | PE/Biotin                      | BD Bioscience |
| Anti-CD11b            | M1/70      | Percp-Cy <sup>TM</sup> 5.5     | BD Bioscience |
| Anti-CD25             | PC61       | PE/biotin                      | BD Bioscience |
| Anti-CD44             | 1M7        | APC                            | eBioscience   |
| Anti-CD62L            | MEL-14     | PE                             | BD Bioscience |
| Anti-CD122            | 5H4        | PE                             | eBioscience   |
| Anti-CD124            | mIL4R-M1   | PE                             | BD Bioscience |
| Anti-CD127            | A7R34      | PE                             | eBioscience   |
| Anti-Ly6G/C (Gr1)     | RB6-8C5    | eFluor450                      | eBioscience   |
| Anti- Ly6G            | 1A8        | FITC/PE                        | BD Bioscience |
| Anti-Foxp3            |            | PE-Cy5                         | Biolegend     |
| Anti-TCR- $\beta$     | H57-597    | PE-Cy5/ APC-eFluor780          | eBioscience   |
| Anti-TCR- $\delta$    | eBioGL3    | APC                            | eBioscience   |
| Anti-TCR- $\delta$    | GL3        | FITC/Biotin                    | Home-made     |
| Anti-TCR-V $\gamma$ 1 | 2.11       |                                |               |
| Anti-TCR-V $\gamma$ 4 | UC3        |                                |               |
| Anti-TNF $\alpha$     | MP6-XT22   | PE                             | BD Bioscience |
| Anti-IFN $\gamma$     | XMG1.2     | PE/ Percp-Cy <sup>TM</sup> 5.5 | BD Bioscience |
| Anti-IL-2             | JES6-5H4   | PE                             | BD Bioscience |
| Anti-IL-6             | MP5-20F3   | PE                             | BD Bioscience |
| Anti-IL-10            | JES3-19F1  | PE                             | BD Bioscience |
| Anti-IL-13            | eBio13A    | PE                             | eBioscience   |
| Anti-IL-17A           | TC11-18H10 | PE                             | BD Bioscience |
| Anti-IL-17F           | eBio18F10  | PE                             | eBioscience   |
| Streptavidin          |            | FITC                           | eBioscience   |
| Streptavidin          |            | PE-Cy5                         |               |
| Streptavidin          |            | APC                            |               |
| Streptavidin          |            | eFluor450                      |               |

## Supplemental Figures

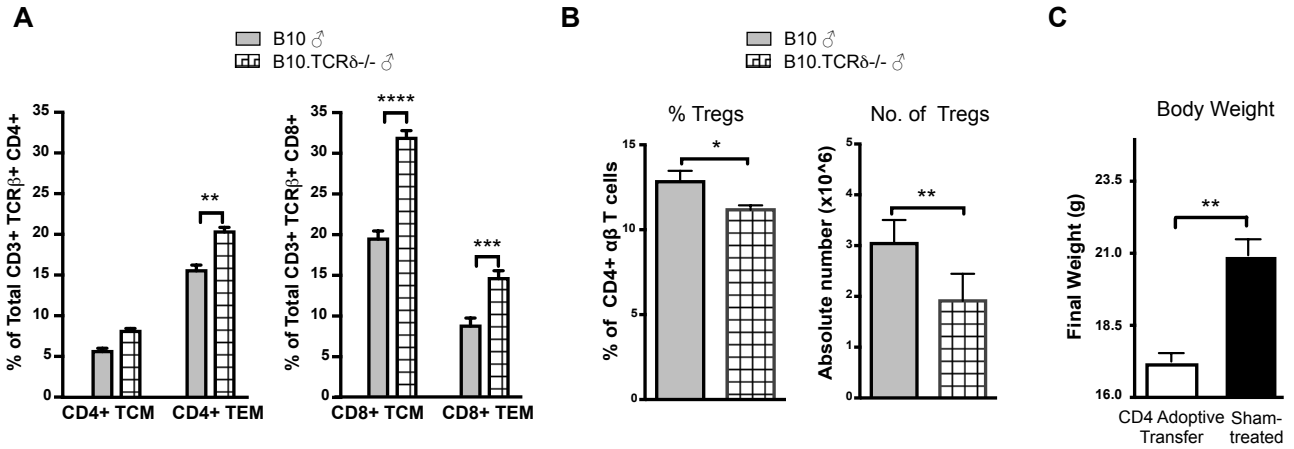

**Supp. Fig. 1. A. CD8 memory cells are increased in B10.TCRδ<sup>-/-</sup> male mice as well.** Cells were analyzed as described for Fig. 2 D, except that cells from 3-6 mice per group were tested. Error bars indicates SEM. **B. Tregs are similarly reduced in B10.TCRδ<sup>-/-</sup> male mice.** Cells were analyzed as described in the legend to Fig. 5A, using 4 B10 male mice and 13 B10.TCRδ<sup>-/-</sup> male mice. Error bars indicate SEM. **C. CD4<sup>+</sup> T cell adoptive transfer results in weight loss.** Final weights of B10.TCRβ/δ<sup>-/-</sup> females mice shown Fig. 1A, at 18 weeks of age, after being either sham-treated or given an adoptive transfer of CD4<sup>+</sup> T cells from the spleens of keratitic B10.TCRδ<sup>-/-</sup> female donors. Error bars indicate SEM.

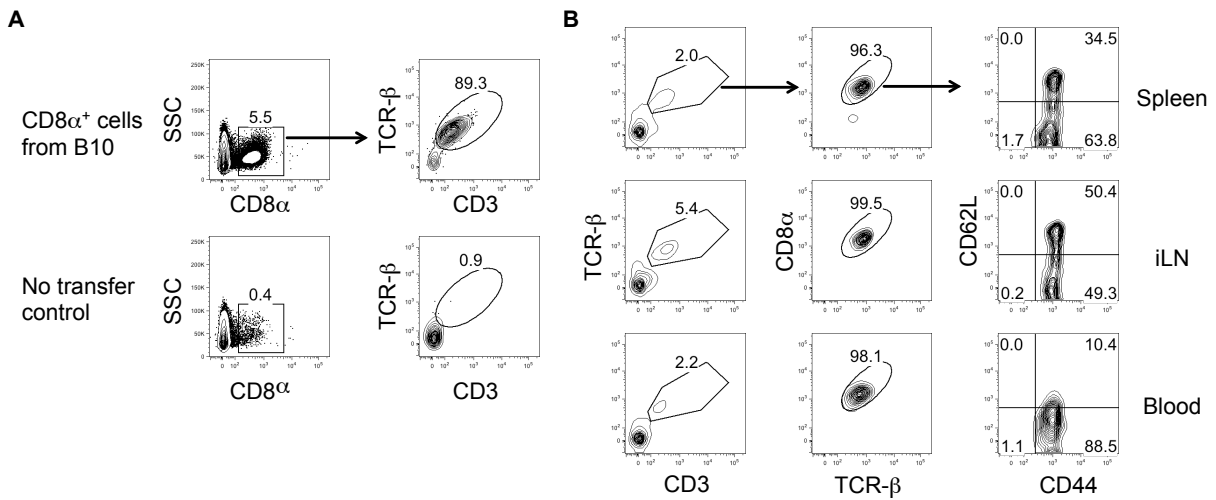

**Supp. Fig. 2. The composition of CD8 $\alpha$ + cells in B10.TCR $\beta$  $\delta$ <sup>-/-</sup> mice 3 weeks after receiving 2 x 10<sup>5</sup> CD8 $\alpha$ + adoptively transferred cells from B10 mice. **A.** Flow cytometric analysis of cells from the spleens of these mice showing that virtually all of the CD8 $\alpha$ + cells are CD3+ TCR $\beta$ +, and  $\gamma\delta$  T cells, which would be CD3+ TCR $\beta$ -, were not detectable. Note that about 10% of the CD8 $\alpha$ + cells are CD3- and TCR $\beta$ -, and likely represent dendritic cells. The flow cytometry profile from the spleen of an untransferred B10.TCR $\beta$  $\delta$ <sup>-/-</sup> mouse was included in the analysis to show that nonspecific staining for CD3 and TCR $\beta$  is minimal. **B.** Cells from other tissues of the same mice were analyzed as described in the legend to Fig. 2C. Transferred CD8 $\alpha$ + cells can be found in spleen, lymph node, and blood in the B10.TCR $\beta$  $\delta$ <sup>-/-</sup> recipients, and nearly all display either the TCM (CD44 high, CD62L high) or TEM (CD44-high CD62L low) phenotype.**

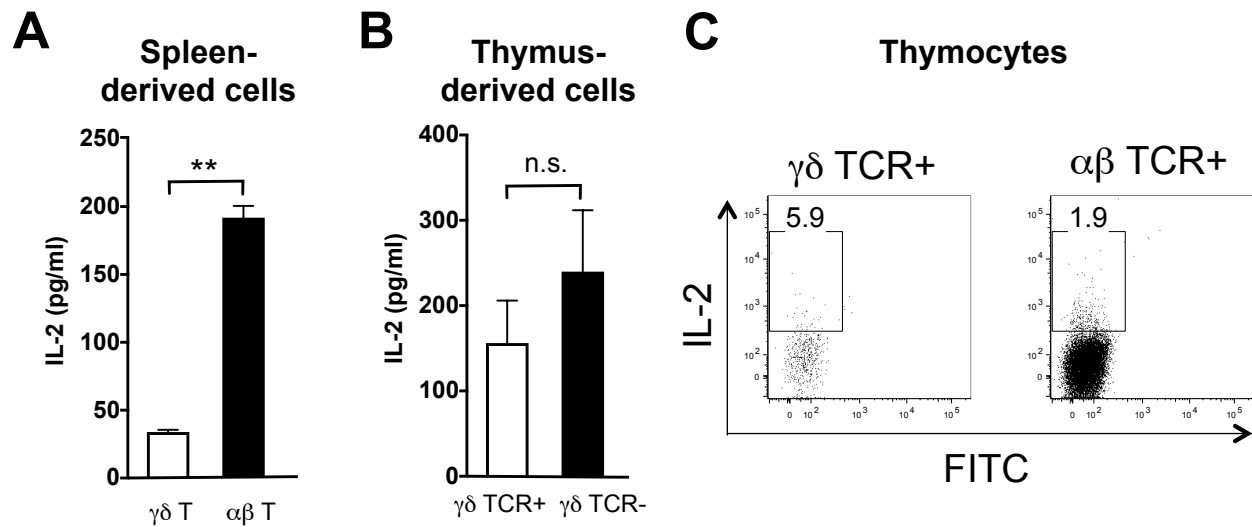

**Supp. Fig. 3. Thymic  $\gamma\delta$  T cells in B10 mice produce IL-2.** **A.** Spleen cells from 9 weeks old female B10 mice expressing  $\gamma\delta$  or  $\alpha\beta$  TCR were purified by positive selection, using biotinylated anti-TCR $\delta$  or anti-TCR $\beta$  mAbs with streptavidin-complexed MACS beads and columns. Equivalent numbers of each cell type were then cultured in the presence of plate-bound anti-CD3 mAb for 3 days; the supernatants were harvested and tested for IL-2 in an ELISA assay (eBioscience). The mean value obtained from 4 mice is shown; error bars represent SEM. **B.** From the thymi of the same mice as in A, MACS-purified  $\gamma\delta$  TCR+ and  $\gamma\delta$  TCR-negative thymocytes (the flow-through cells from the MACS columns) were prepared and similarly analyzed. **C.** Unmanipulated thymocytes from 9 week old female B10 mice were cultured for 6 hours with PMA/ionomycin in the presence of Brefeldin A. After staining with CD3-, TCR $\beta$ -, and TCR $\delta$ -specific mAbs, cells were fixed, permeabilized with saponin, and stained intracellularly with an IL-2-specific mAb reagent. The panel shows the results of the flow cytometric analysis from a representative mouse. The difference in percent of IL-2+ cells between  $\gamma\delta$  vs.  $\alpha\beta$  TCR+ cells was not statistically significant when the means obtained from 4 mice were compared (not shown).
